# Supplementary material
Source: Springer Nature journal article supplement (https://mijn.bsl.nl/resource/supplementary/13047_2009_128_MOESM4_ESM.pdf/7109956)

**Pain subscale of the Foot Function Index (mm)**

80  
60  
40  
20  
0

baseline

week 8

week 12

week 24

22

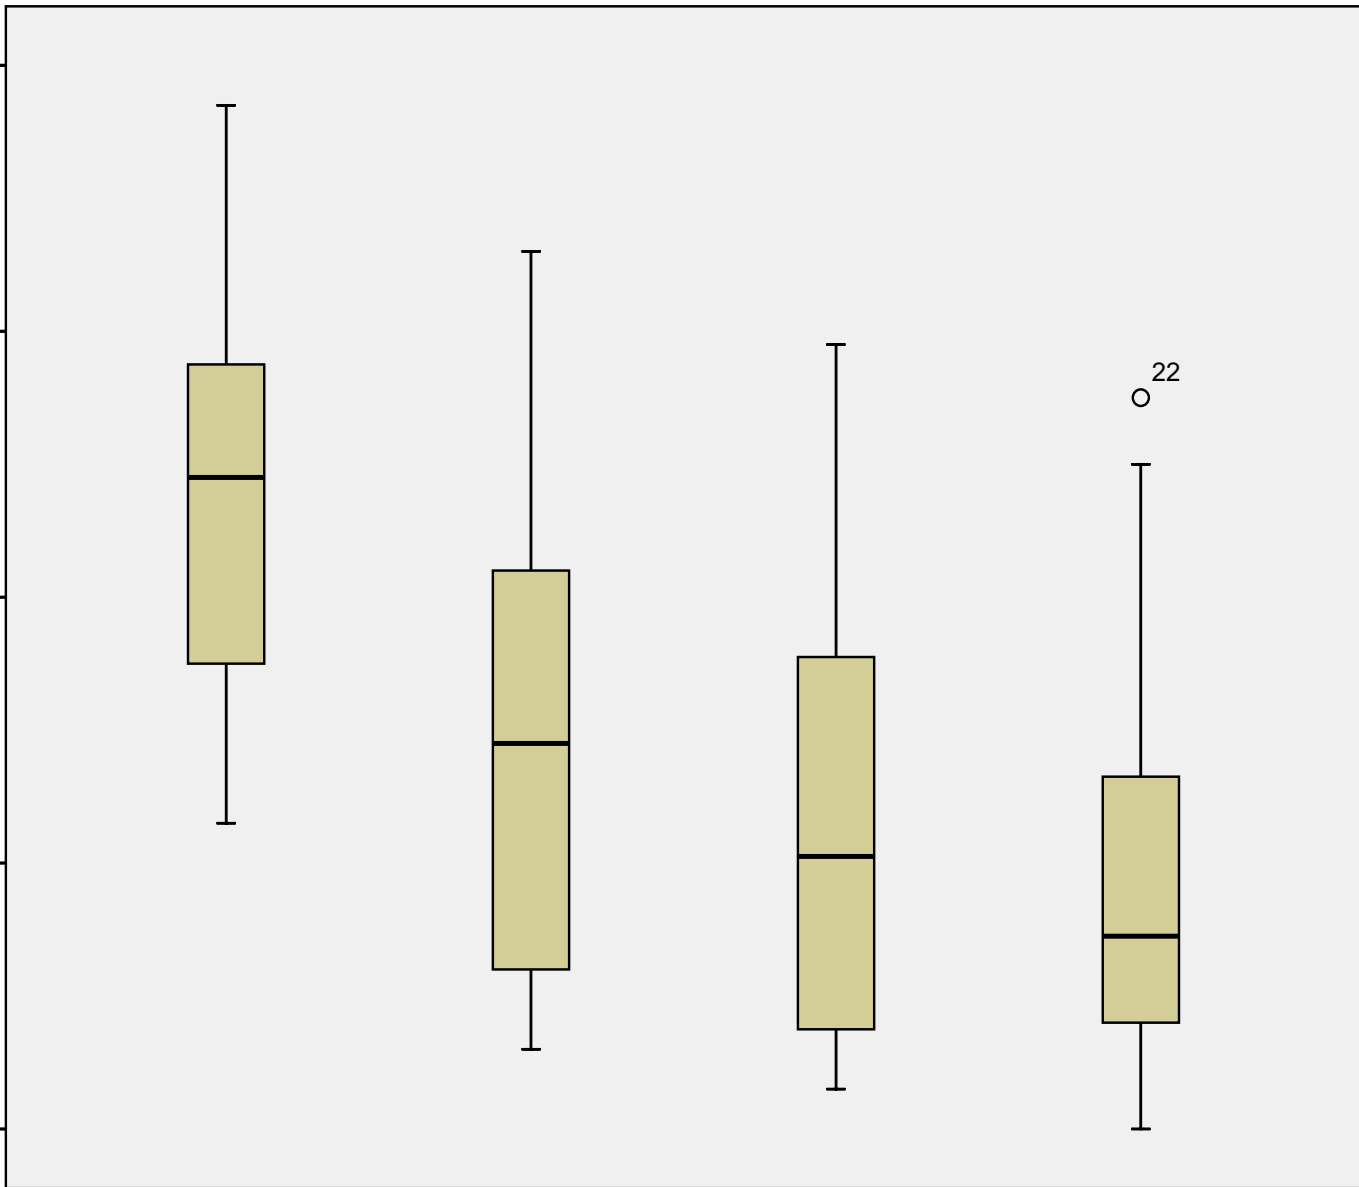

Supplement: MOESM4 [file 7109956]
